# Supplementary material for: Genome-Wide Identification and Expression Analysis of MTP (Metal Ion Transport Proteins) Genes in the Common Bean
Source: MDPI journal article supplement (doi:10.3390/plants12183218), 2023-09-09
Supplement: s1 [file s1]

# Supplementary Material

## Genome-Wide Identification and Expression Analysis of MTP (Metal Ion Transport Proteins) Genes in the Common Bean

Hilal Yilmaz <sup>1,2</sup>, Göksel Özer <sup>3</sup>, Faheem Shehzad Baloch <sup>4,\*</sup>, Vahdettin Çiftçi <sup>2</sup>, Yong Suk Chung <sup>5</sup> and Hyeon-Jin Sun <sup>6,\*</sup>

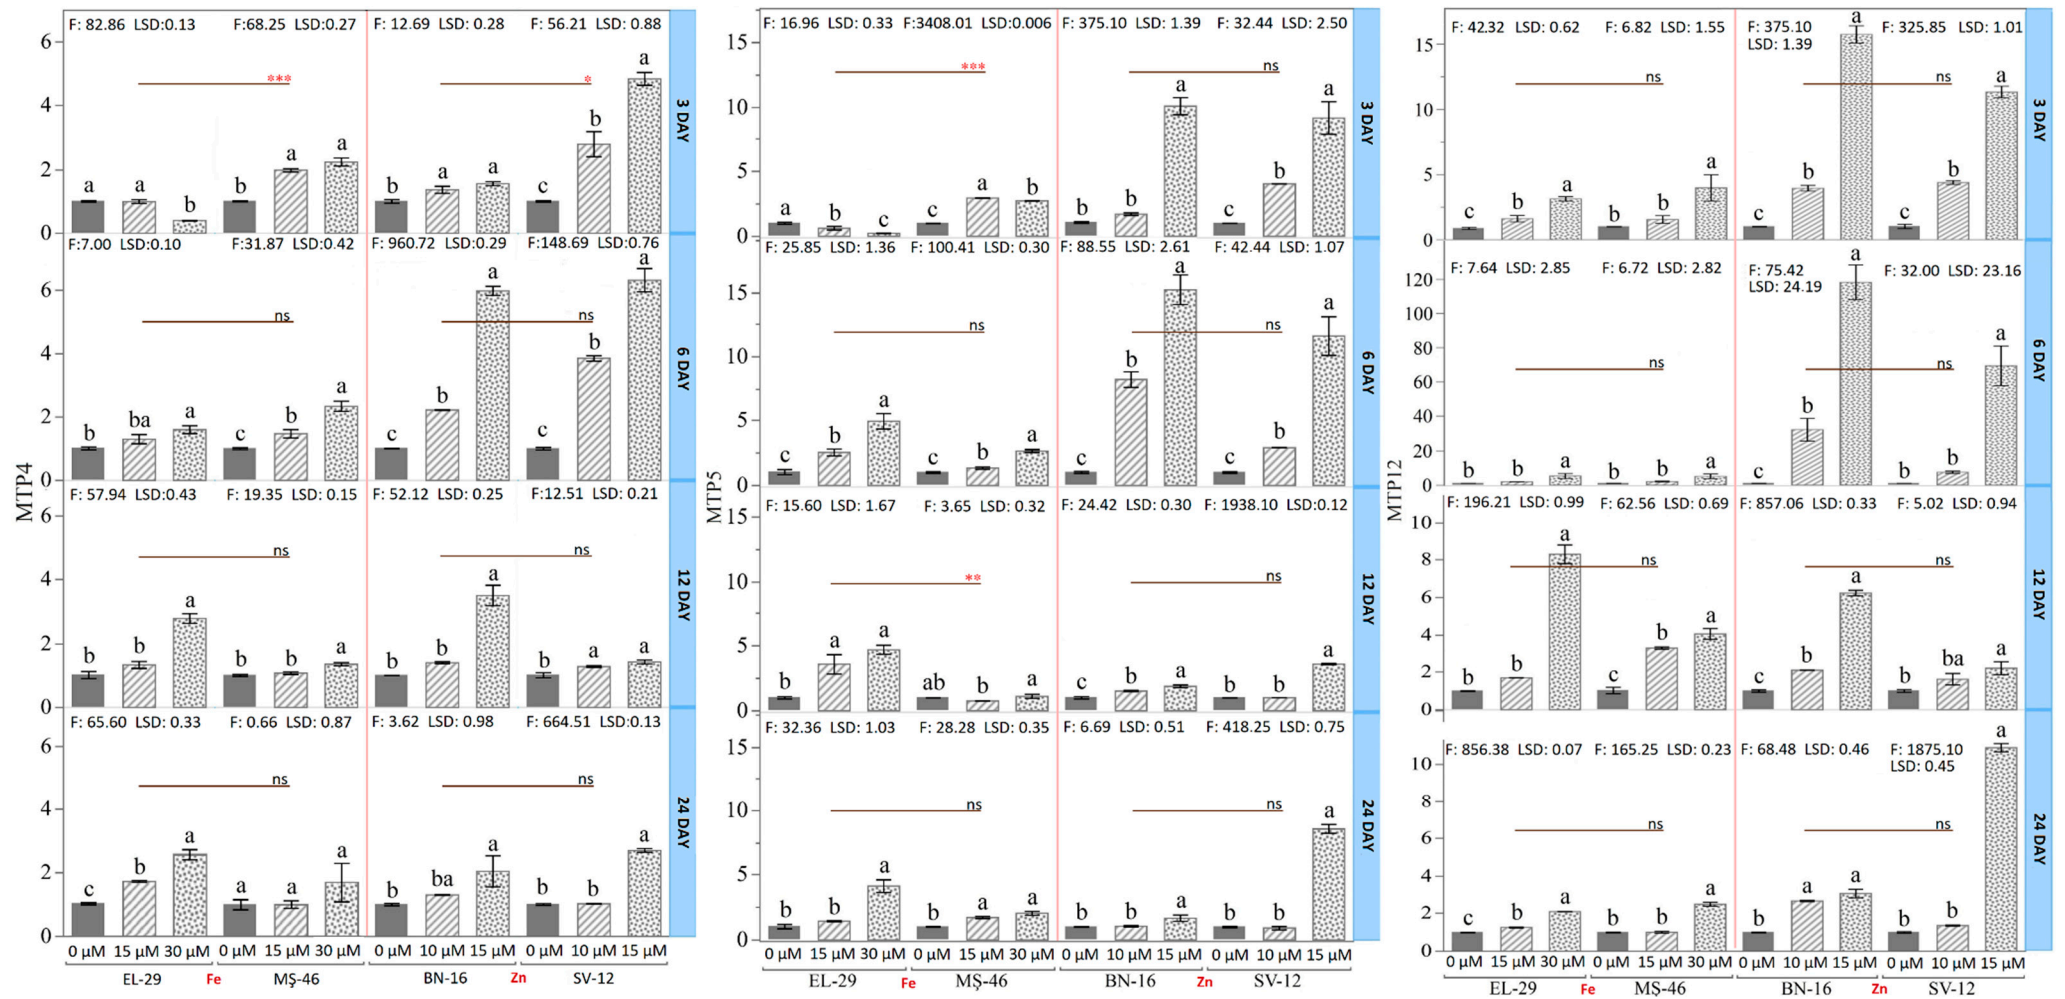

**Figure S1.** Expression levels of *PpMTP* (4, 5, 12) genes in the pod of common beans genotypes under Fe (0, 15 and 30  $\mu$ M) and Zn (0, 10, 15  $\mu$ M) application in harvested a different day (Different letters indicate significant differences according to Student's t-test, \* ( $p \leq 0.05$ ); \*\* ( $p \leq 0.01$ ); \*\*\* ( $p \leq 0.001$ ); ns: non-significant).

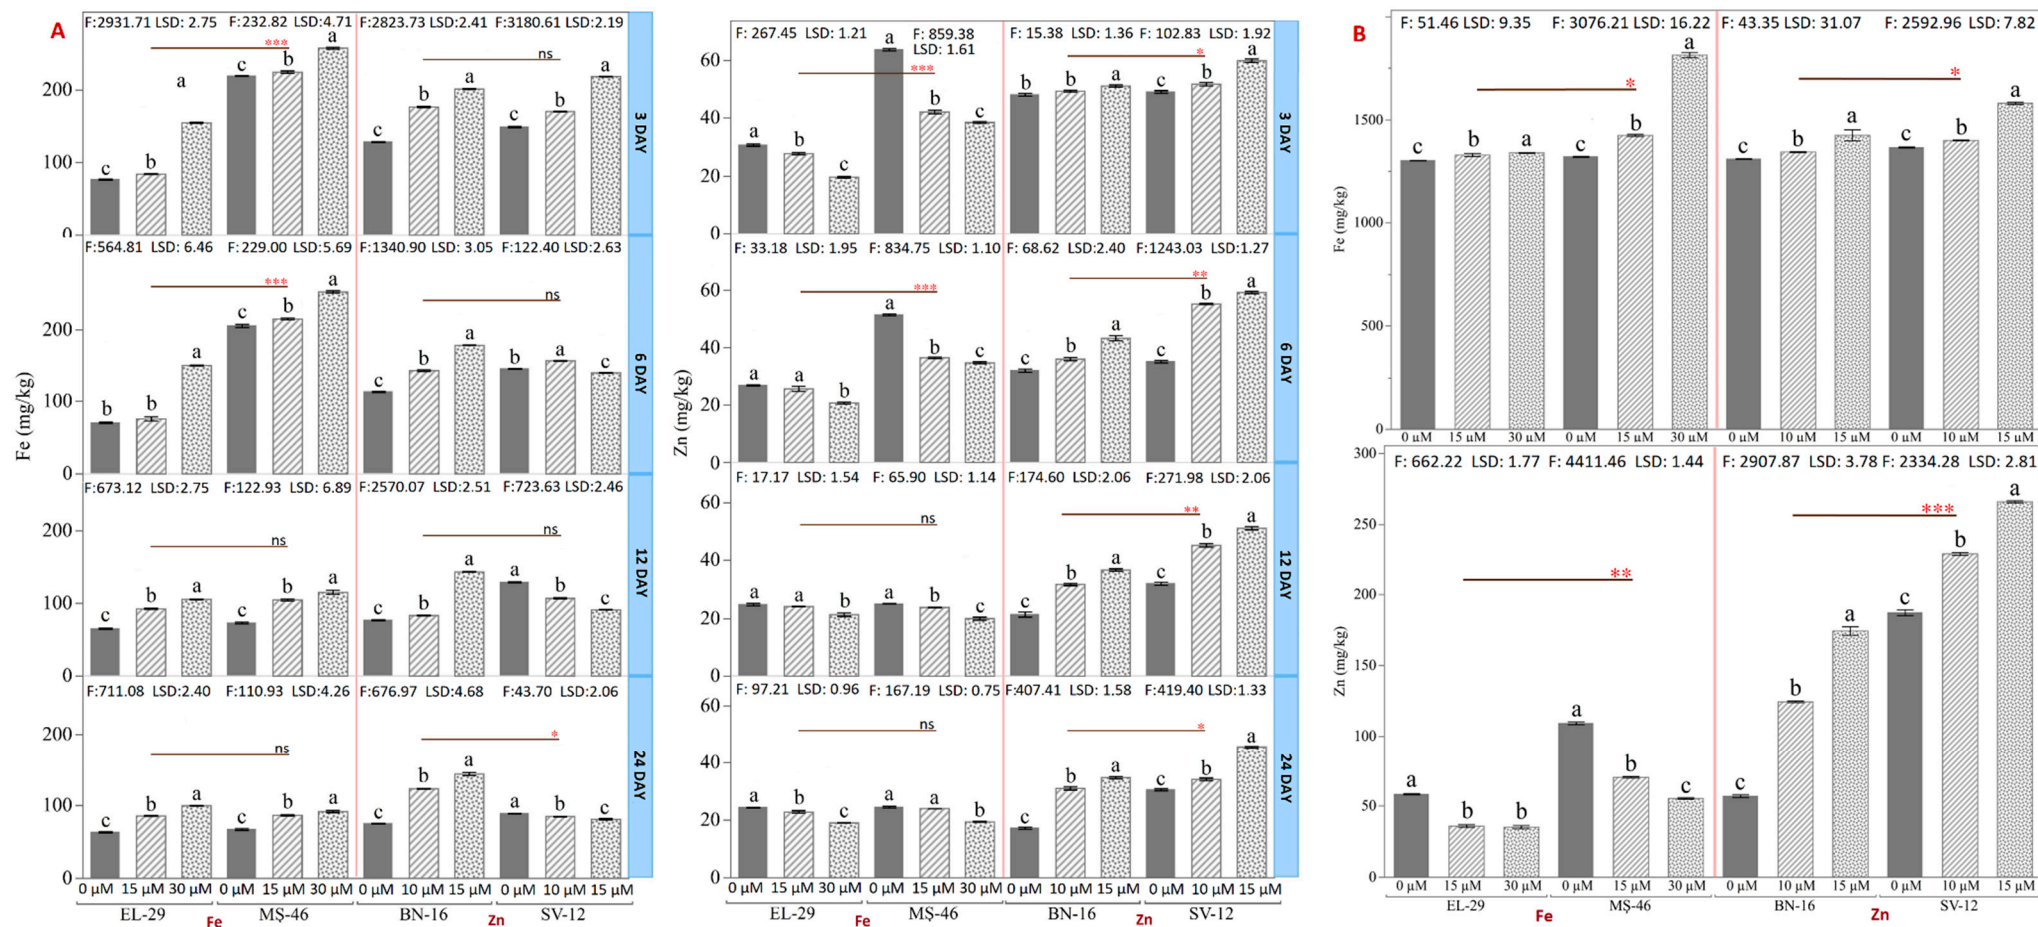

**Figure S2.** Fe and Zn amount in pod (A) and root (B) of common beans genotypes under Fe (0, 15 and 30  $\mu\text{M}$ ) and Zn (0, 10, 15  $\mu\text{M}$ ) applications (Different letters indicate significant differences according to Student's t-test, \* ( $p \leq 0.05$ ); \*\* ( $p \leq 0.01$ ); \*\*\* ( $p \leq 0.001$ ); ns: non-significant).
